# Supplementary material
Source: Springer Nature journal article supplement (https://www.springermedizin.de/resource/supplementary/13058_2010_2596_MOESM6_ESM.pdf/9701780)

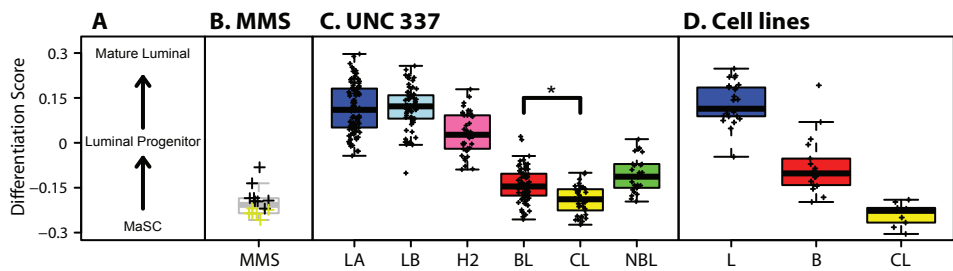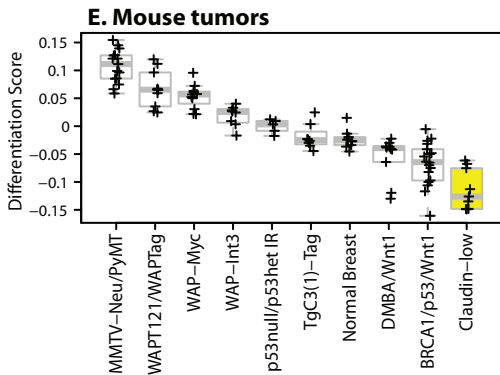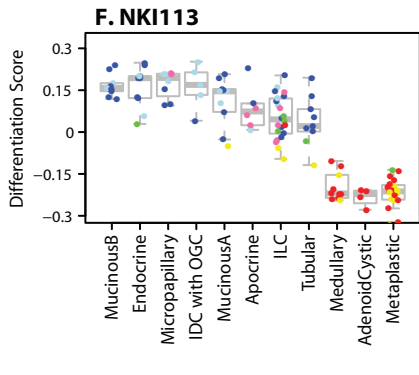

Supplement: MOESM6 [file 9701780]
